# Supplementary material for: Association of Serum Bilirubin and Functional Variants of Heme Oxygenase 1 and Bilirubin UDP-Glucuronosyl Transferase Genes in Czech Adult Patients with Non-Alcoholic Fatty Liver Disease
Source: MDPI journal article supplement (doi:10.3390/antiox10122000), 2021-12-15
Supplement: s1 [file s1]

**Table S1. Laboratory and clinical parameters in patients with different *HMOX1* promoter genotypes.**

| Parameter                                | <i>HMOX1</i> genotype |                        |                        |                         | <i>P</i> -value |
|------------------------------------------|-----------------------|------------------------|------------------------|-------------------------|-----------------|
|                                          | M/L<br>(n=6)          | M/M<br>(n=29)          | S/M<br>(n=37)          | S/S<br>(n=10)           |                 |
| <b>Bilirubin</b><br>( $\mu$ mol/l)       | 15<br>(9.9-17.9)      | 13.1<br>(7.6-18.2)     | 9.1<br>(6.9-14.7)      | 13.2<br>(9.1-14.7)      | ns              |
| <b>GGT</b><br>( $\mu$ kat/l)             | 4.39<br>(0.93-5.5)    | 1.66<br>(0.63-2.97)    | 1.24<br>(0.98-2.05)    | 0.99<br>(0.62-1.57)     | ns              |
| <b>ALT</b><br>( $\mu$ kat/l)             | 1.25<br>(0.63-2.07)   | 0.69<br>(0.46-2.2)     | 0.96<br>(0.65-1.8)     | 0.5<br>(0.39-1.72)      | ns              |
| <b>AST</b><br>( $\mu$ kat/l)             | 0.87<br>(0.5-1.24)    | 0.62<br>(0.45-1.08)    | 0.67<br>(0.52-1.07)    | 0.45<br>(0.39-0.93)     | ns              |
| <b>Albumin</b><br>(g/l)                  | 47.2<br>(45.1-48.4)   | 45.3<br>(37.3-46.4)    | 47.3<br>(44.4-49.1)    | 46.2<br>(44.6-47.6)     | ns              |
| <b>BMI</b><br>(kg/m <sup>2</sup> )       | 29.4<br>(28.4-29.9)   | 30.6<br>(27.7-33.7)    | 29.6<br>(28.3-31.6)    | 32.5<br>(27.8-37.5)     | ns              |
| <b>IL-2</b><br>(ng/l)                    | 2.55<br>(0.14-18.9)   | 0.54<br>(0.14-1.2)     | 0.61<br>(0.3-4.2)      | 0.34<br>(0.1-0.9)       | ns              |
| <b>IL-6</b><br>(ng/l)                    | 16.44<br>(4.9-25.9)   | 4.83<br>(2-15.2)       | 4.27<br>(1.9-18)       | 5.18<br>(2.2-29.1)      | ns              |
| <b>TNF-<math>\alpha</math></b><br>(ng/l) | 6.22<br>(5.6-6.9)     | 9.5<br>(7.3-12.2)      | 9.1<br>(6.3-13.4)      | 8.19<br>(6.3-17.2)      | ns              |
| <b>Adiponectin</b><br>(mg/l)             | 5.0<br>(3.9-9.8)      | 5.2<br>(3.5-12.3)      | 4.5<br>(2.7-7.5)       | 8.8<br>(4.3-14.1)       | ns              |
| <b>Leptin</b><br>( $\mu$ g/l)            | 8.3<br>(4.6-13.4)     | 10.2<br>(5.8-18.7)     | 7.4<br>(4.5-11.6)      | 8.6<br>(5.5-18.4)       | ns              |
| <b>HA</b><br>( $\mu$ g/l)                | 33.4<br>(18.6-70.3)   | 22.5<br>(11.9-38.9)    | 24<br>(16.6-34.3)      | 19.2<br>(16-137)        | ns              |
| <b>M30</b><br>(U/l)                      | 7.29<br>(6.2-404)     | 72.2<br>(9.9-292)      | 13<br>(8.5-176)        | 184.5<br>(13.4-292)     | ns              |
| <b>M65</b><br>(U/l)                      | 534<br>(375-1085)     | 833<br>(417-1310)      | 572<br>(407-1126)      | 647<br>(441-900)        | ns              |
| <b>AST/ALT</b>                           | 0.72<br>(0.57-0.9)    | 0.7<br>(0.56-1.13)     | 0.61<br>(0.56-0.9)     | 0.76<br>(0.5-0.95)      | ns              |
| <b>APRI</b>                              | 0.52<br>(0.3-0.8)     | 0.55<br>(0.3-0.8)      | 0.5<br>(0.3-1)         | 0.5<br>(0.2-0.8)        | ns              |
| <b>FIB 4</b>                             | 1.07<br>(1-1.8)       | 1.51<br>(1-1.9)        | 1.04<br>(0.8-1.9)      | 1.22<br>(0.7-2.2)       | ns              |
| <b>NAFLD<br/>fibrosis score</b>          | -2.1 (-4.3--<br>1.4)  | -1.56<br>(-2.2-(-0.3)) | -2.43<br>(-3.1-(-0.2)) | -2.71<br>(-3.9-(-0.15)) | ns              |
| <b>BARD score</b>                        | 1<br>(0-1.75)         | 2<br>(1-3)             | 1<br>(1-3)             | 1<br>(0-3)              | ns              |

Data are expressed as the median and IQ range. Analyzed by ANOVA; ns, not significant.

The length variations of *HMOX1* (GT)<sub>n</sub> repeats were classified into short S (n < 27), medium M (n = 27–32), and long L (n = 33) subgroups. S/L genotype was not assessed due to the small number of patients (n=2).

**Table S2. Laboratory and clinical parameters of patients with different *UGT1A1* promoter genotypes.**

| Parameter                                 | <i>UGT 1A1</i> genotype |                        |                        | <i>P</i> for trend |
|-------------------------------------------|-------------------------|------------------------|------------------------|--------------------|
|                                           | 6/6<br>(n=26)           | 6/7<br>(n=45)          | 7/7<br>(n=11)          |                    |
| <b>Bilirubin</b><br>( $\mu\text{mol/l}$ ) | 8.3<br>(6.2-11)         | 13.1<br>(8.3-16.8)     | 17.7<br>(8.2-18.8)     | 0.02               |
| <b>GGT</b><br>( $\mu\text{kat/l}$ )       | 1.85<br>(0.7-3.4)       | 1.3<br>(0.7-2.7)       | 1.21<br>(0.8-1.8)      | ns                 |
| <b>ALT</b><br>( $\mu\text{kat/l}$ )       | 0.98<br>(0.5-1.8)       | 0.85<br>(0.5-2.3)      | 0.94<br>(0.5-1.4)      | ns                 |
| <b>AST</b><br>( $\mu\text{kat/l}$ )       | 0.62<br>(0.5-1)         | 0.67<br>(0.5-1.2)      | 0.55<br>(0.4-0.8)      | ns                 |
| <b>Albumin</b><br>(g/l)                   | 45.6<br>(41-48)         | 45.9<br>(43-48)        | 47.6<br>(46-49)        | ns                 |
| <b>BMI</b><br>( $\text{kg/m}^2$ )         | 29.6<br>(27.6-31.3)     | 30.1<br>(28.9-34.9)    | 31.2<br>(29.6-33.6)    | ns                 |
| <b>IL-2</b><br>(ng/l)                     | 0.23<br>(0.13-0.83)     | 0.87<br>(0.21-2.6)     | 0.47<br>(0.21-6.1)     | ns                 |
| <b>IL-6</b><br>(ng/l)                     | 4.05<br>(1.1-11.3)      | 5.88<br>(2.2-21.3)     | 7.83<br>(2.2-17.7)     | ns                 |
| <b>TNF-<math>\alpha</math></b><br>(ng/l)  | 8.52<br>(6.3-11.9)      | 9.06<br>(6.3-12.8)     | 8.76<br>(4.8-16.4)     | ns                 |
| <b>Adiponectin</b><br>(mg/l)              | 4.8<br>(3.5-7.1)        | 6.3<br>(3.3-11.5)      | 3.7<br>(3-5.2)         | ns                 |
| <b>Leptin</b><br>( $\mu\text{g/l}$ )      | 7.1<br>(2.6-9.9)        | 8.8<br>(6.5-18.7)      | 9.3<br>(4.2-15.9)      | ns                 |
| <b>HA</b><br>( $\mu\text{g/l}$ )          | 23.7<br>(18-35)         | 24.9<br>(11-46)        | 19.9<br>(17-26)        | ns                 |
| <b>M30</b><br>(U/l)                       | 23.4<br>(9-297)         | 14.8<br>(8-267)        | 12.7<br>(8-336)        | ns                 |
| <b>M65</b><br>(U/l)                       | 542<br>(453-1026)       | 784<br>(375-1363)      | 602<br>(378-1393)      | ns                 |
| <b>AST/ALT</b>                            | 0.6<br>(0.6-1)          | 0.77<br>(0.6-0.9)      | 0.66<br>(0.6-0.9)      | ns                 |
| <b>APRI</b>                               | 0.5<br>(0.3-0.9)        | 0.57<br>(0.3-0.9)      | 0.37<br>(0.3-0.6)      | ns                 |
| <b>FIB 4</b>                              | 1.36<br>(0.8-2.2)       | 1.32<br>(0.9-1.9)      | 0.97<br>(0.8-1.2)      | ns                 |
| <b>NAFLD fibrosis score</b>               | -2.08<br>(-4.2-(-0.03)) | -2.18<br>(-3.2-(-0.9)) | -1.61<br>(-2.3-(-0.6)) | ns                 |
| <b>BARD score</b>                         | 1<br>(0-3)              | 2<br>(1-3)             | 1<br>(1-2.25)          | ns                 |

Data are expressed as the median and IQ range. Comparisons were performed using analysis of variance (ANOVA) on ranks with Dunn's *post hoc* analysis. ns, not significant

6/7 genotype group also covers one subject with 5/7 genotype
